# Supplementary material
Source: PubMed Central journal article supplement (PMC3148313)
Supplement: NIHMS303632-supplement-1.pdf [file NIHMS303632-supplement-1.pdf]

## Figure S1

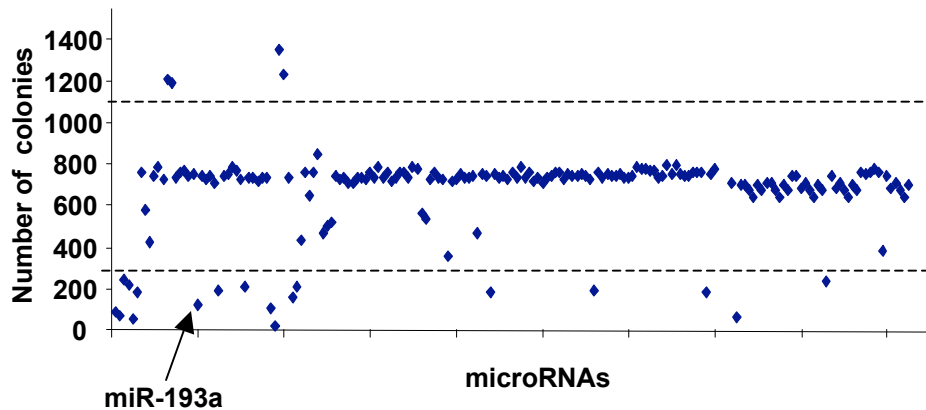

### Figure S1. miRs that suppress or support transformation of the ELR transformed cells.

Transformed fibroblasts over expressing 365 different miRs in an anchorage-independent growth on soft agar. Most of the cells had about 800 colonies; cells that had less than 300 colonies (dashed lower line) are candidates for expressing tumor suppressor miR. Over expression of miR-193a reduce the number of colonies down to around 100 colonies (arrow). Cells that had more than 1100 colonies (dashed upper line) represent miRs that enhance tumorigenesis.

## Figure S2

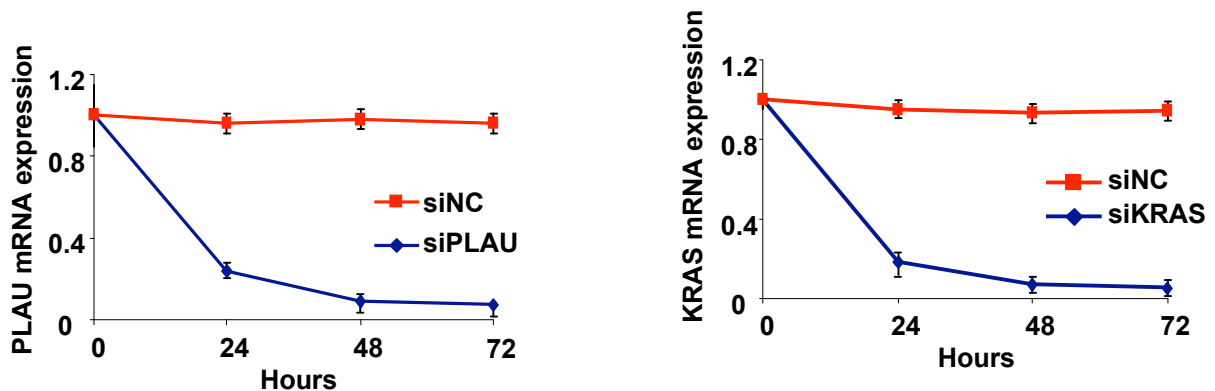

**Figure S2. Efficiency of PLAU and KRAS inhibition of expression by siRNAs.** We assessed PLAU and KRAS mRNA expression levels by real-time PCR analysis in different time points after treatment with siRNA negative control, siRNA against PLAU and siRNA against KRAS. The data are presented as mean  $\pm$ SD of three independent experiments.
